# Supplementary material
Source: PubMed Central journal article supplement (PMC3188991)

**A**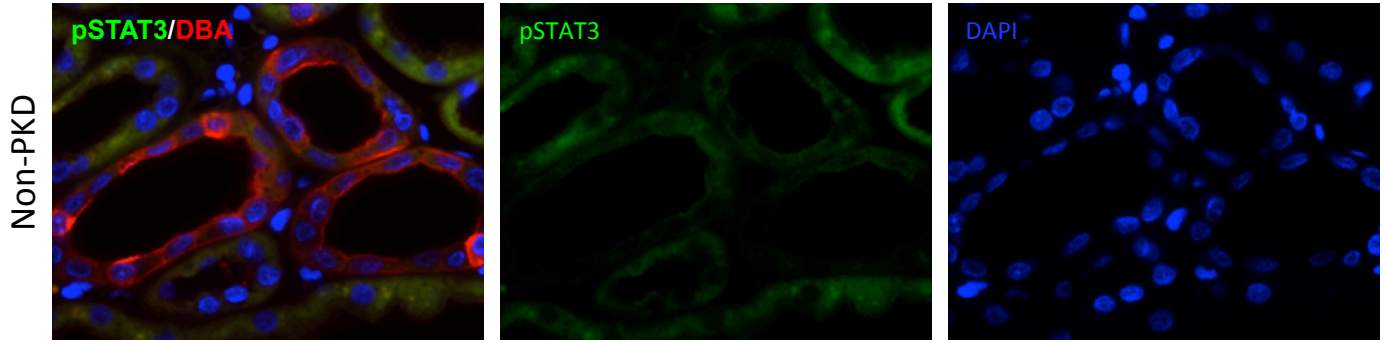**B**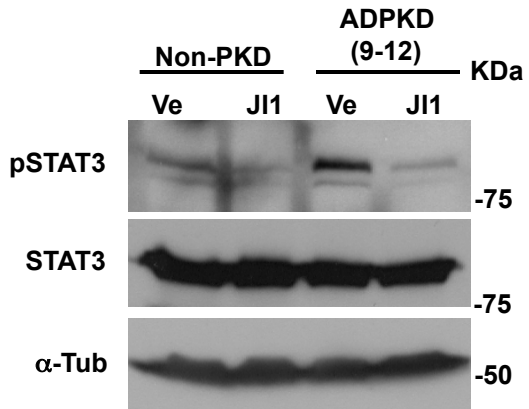

**A**

## Vehicle-treated IKO

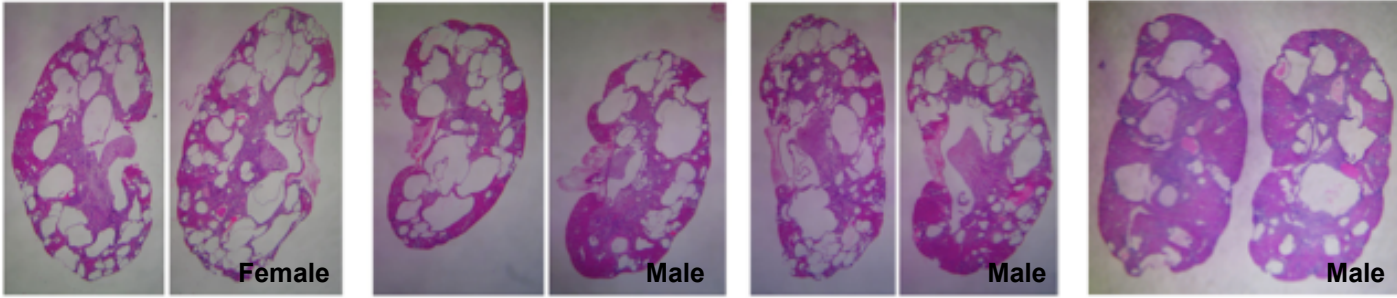

## S3I-201-treated IKO

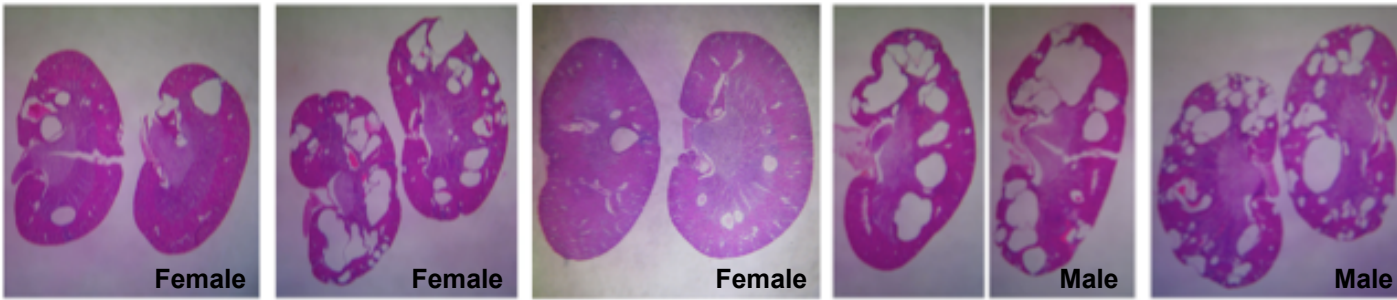

## Pyrimethamine-treated IKO

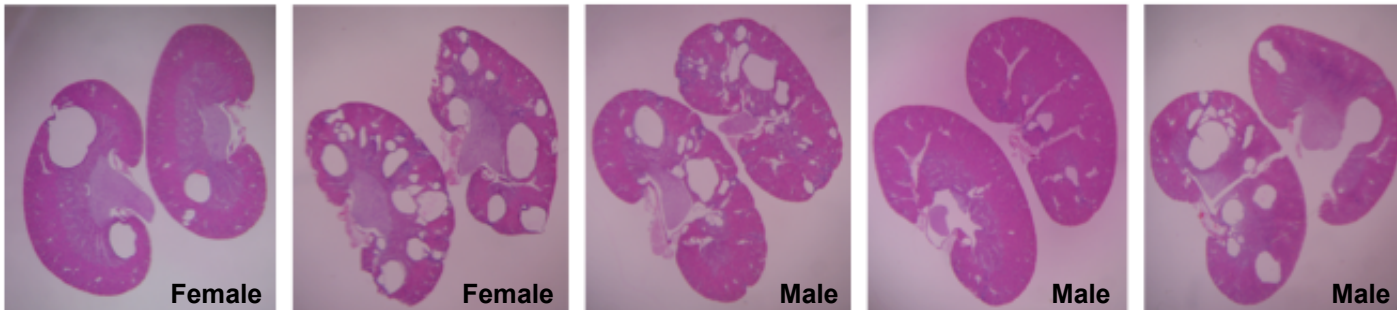

Supplement: supp_ddr338_ddr338supp_fig.pdf [file supp_ddr338_ddr338supp_fig.pdf]
